# Supplementary material
Source: publisher figshare collection journal article supplement (https://acs.figshare.com/ndownloader/files/4670326)
Supplement: Supplementary file 1 [file 4670326]

Supporting Information for

**Site-Specific Insertion of 3-Aminotyrosine into Subunit  $\alpha 2$   
of *E. coli* Ribonucleotide Reductase: Direct Evidence for  
Involvement of Y<sub>730</sub> and Y<sub>731</sub> in Radical Propagation**

Mohammad R. Seyedsayamdost,<sup>†</sup> Jianming Xie,<sup>§</sup> Clement T. Y. Chan,<sup>†</sup> Peter G. Schultz<sup>§</sup>  
and JoAnne Stubbe<sup>\*,†,‡</sup>

*Department of Chemistry<sup>†</sup> and Biology<sup>‡</sup>, Massachusetts Institute of Technology, 77  
Massachusetts Avenue, Cambridge, MA 02139-4307, and Department of Chemistry  
and the Skaggs Institute for Chemical Biology, The Scripps Research Institute,  
10550 North Torrey Pines Road, La Jolla, CA 92037  
stubbe@mit.edu*

**Cloning of pBAD-*nrda* and Insertion of TAG codons.** Vector pBAD-JYCUA was obtained from the Schultz lab (ref. 61, text). The *nrda* gene was cloned from pMJ1-*nrda* into pBAD-JYCUA using the NcoI and KpnI restriction sites by standard methods to yield pBAD-*nrda*. Insertion of TAG codons at positions 730 and 731 was carried out as described for pTrc-*nrda* using primers 3–6 (see Methods). The mutations were confirmed by sequencing the entire gene at the MIT Biopolymers Laboratory.

**Generation of pMJ1-*nrda*<sub>730</sub>TAG and pMJ1-*nrda*<sub>731</sub>TAG.** Vector pMJ1-*nrda* has been reported before (ref. 60, text). Insertion of TAG codons at positions 730 and 731 was carried out as described for pTrc-*nrda* using primers 3–6 (see Methods). The mutations were confirmed by sequencing the entire gene at the MIT Biopolymers Laboratory.

**Attempts at Expression of Y<sub>730</sub>NH<sub>2</sub>Y- $\alpha$ 2.** In an effort to maximize production of  $\alpha$ 2 containing NH<sub>2</sub>Y, without generation of NH<sub>2</sub>Y•, growth conditions were examined at different temperatures, under aerobic and anaerobic conditions and with hydroxyurea in the media to reduce the Y<sub>122</sub>• in wt  $\beta$ 2.

In each case, a single colony of DH10B or BL21(DE3) *E. coli* cells was used to inoculate a 5 mL 2YT small culture. After saturation, this culture was diluted 100-fold into 2 × 100 mL GMMML media. When OD<sub>600 nm</sub> was ~0.6–0.8, and after the variations detailed below, one flask was supplemented with NH<sub>2</sub>Y and DTT to final concentrations of 1 mM and 0.1 mM, respectively. The other growth served as the control. After 15 min, expression of NH<sub>2</sub>Y- $\alpha$ 2 was induced by addition of IPTG to both 100 mL cultures (or 0.2 % (w/v) L-arabinose with expression system (1) – see below). Small aliquots were removed from each flask after a defined time period (5–12 h) and expression of  $\alpha$ 2 assessed by SDS PAGE analysis in the presence and absence of NH<sub>2</sub>Y/DTT.

When the effect of temperature on expression of Y<sub>730</sub>NH<sub>2</sub>Y- $\alpha$ 2 was tested, growth conditions for the small culture were identical to those above. When OD<sub>600 nm</sub> was ~0.6–0.8, the temperature setting was changed to 25 or 30°C. After 15 min, NH<sub>2</sub>Y and DTT were added and the growth was continued as described above.

When the effect of  $Y_{122}\bullet\text{--}\beta 2$  on expression of  $Y_{730}\text{NH}_2\text{Y--}\alpha 2$  was tested, growth conditions for the small culture were identical to those described above. When  $\text{OD}_{600\text{ nm}}$  was 0.6–0.8, hydroxyurea was added to a final concentration of 65 mM. After 15 min,  $\text{NH}_2\text{Y}$  and DTT were added to final concentrations of 1 mM and 0.1 mM, respectively. After an additional 15 min, induction was carried out as above. Each hour after induction, the culture was supplemented with an additional 15 mM hydroxyurea.

When the effect of  $\text{O}_2$  on expression of  $Y_{730}\text{NH}_2\text{Y--}\alpha 2$  was tested, growth conditions for the small culture were identical to those described above. When the small culture was saturated, it was diluted 100–fold into a 250 mL 2YT medium containing the appropriate antibiotics in a 1 L Erlenmeyer flask. At saturation, the culture was diluted 50–fold into 5–7 L GMMML medium in a fermentor flask with appropriate antibiotics. When  $\text{OD}_{600\text{ nm}}$  was 0.6–0.8, the air was replaced with  $\text{N}_{2(\text{g})}$ . After 15 min,  $\text{NH}_2\text{Y}$  and DTT were added to final concentrations of 1 mM and 0.1 mM, respectively, and the growth continued as described above.

Several expression systems were tested: (1) the  $\text{pBK--NH}_2\text{Y--RS/pBAD--}\alpha 2$  expression system was investigated, in which  $\text{pBK--NH}_2\text{Y--RS}$  carries the  $\text{NH}_2\text{Y--RS}$  gene under control of the constitutive *E. coli* Gln–RS promoter and terminator and a  $\text{Kan}^{\text{R}}$  marker, and vector  $\text{pBAD--}\alpha 2$  carries the  $\alpha 2$  gene with the appropriate amber codon under control of an L–Ara–inducible promoter and a *rrnB* terminator as well as the  $\text{mutRNA}_{\text{CUA}}$  gene under control of a *lpp* promoter and *rrnC* terminator and a  $\text{Tet}^{\text{R}}$  marker; (2) The  $\text{pBK--NH}_2\text{Y--RS/pMJ1--nrda}$  vector combination was examined, in which vector  $\text{pMJ1--nrda}$  carries the *nrda* gene with the amber codon under control of T7 promoter and terminator and a  $\text{Amp}^{\text{R}}$  marker. (3) The  $\text{pAC--NH}_2\text{Y--RS/pMJ1--nrda}$  system was also examined, where  $\text{pAC--NH}_2\text{Y--RS}$  carries the  $\text{NH}_2\text{Y--RS}$  gene under control of *glnS'* promoter and *rrnB* terminator, six copies of the  $\text{mutRNA}_{\text{CUA}}$  gene under control of a *proK* promoter and terminator and a  $\text{Tet}^{\text{R}}$  marker (Table 1).

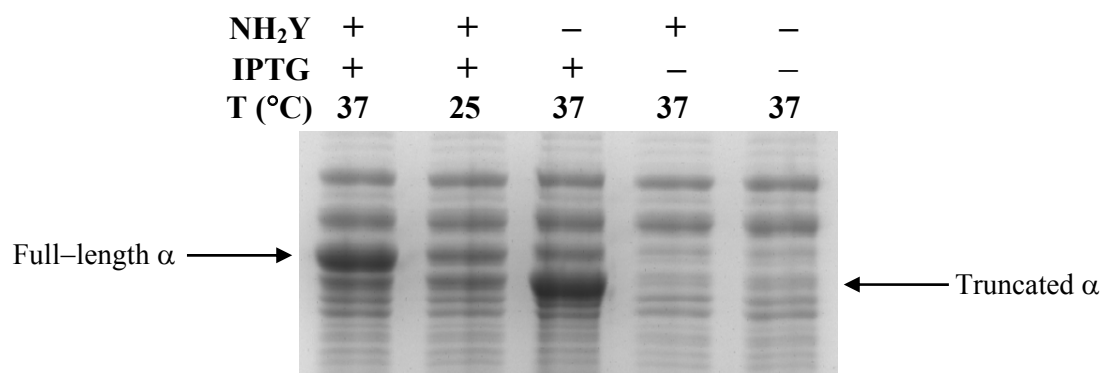

**Figure S1:** Expression of Y<sub>730</sub>NH<sub>2</sub>Y-α2. Cells were grown in the presence or absence of IPTG and NH<sub>2</sub>Y/DTT and at 25° or 37 °C, as indicated, and the level of expression assessed by SDS PAGE. The position of protein bands for full-length α and truncated α are denoted by arrows.

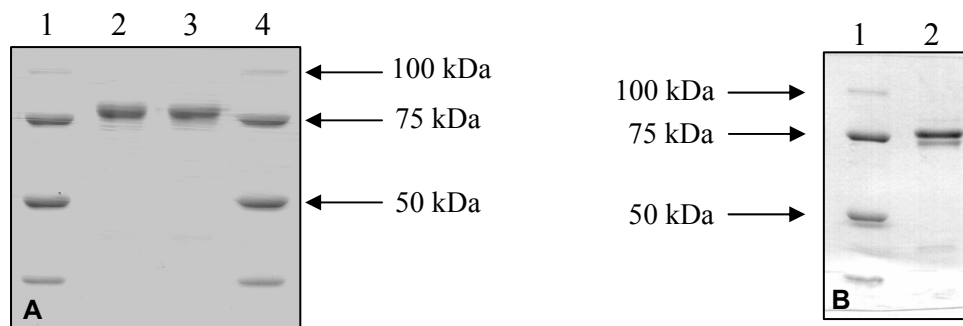

**Figure S2:** SDS PAGE analysis of purified Y<sub>730</sub>NH<sub>2</sub>Y-α2 (A) and Y<sub>731</sub>NH<sub>2</sub>Y-β2 (B). (A) Lanes (1) and (4), MW markers. The MW for each band is indicated. Lane (2), purified Y<sub>730</sub>NH<sub>2</sub>Y-α2 (1.5 μg). Lane (3), purified wt α2 (1.5 μg). (B) Lane (1), MW markers. The MW for each band is indicated. Lane (2), purified Y<sub>731</sub>NH<sub>2</sub>Y-α2 (1.5 μg).

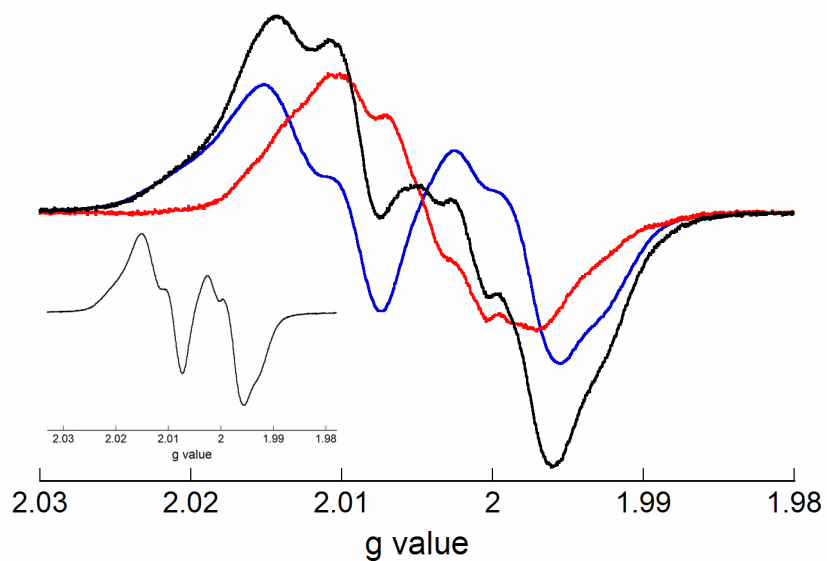

**Figure S3:** Reaction of  $Y_{731}NH_2Y-\alpha 2/ATP$  with wt  $\beta 2/CDP$  monitored by EPR. The reaction components were mixed at 25°C to yield final concentrations of 20  $\mu M$   $Y_{731}NH_2Y-\alpha 2\beta 2$  complex, 1 mM CDP and 3 mM ATP. After 10 s, the reaction was quenched by hand-freezing in liquid  $N_2$  and the EPR spectrum subsequently recorded at 77 K as described in the Methods section. Unreacted  $Y_{122}\bullet$  (blue, 55 % of total spin), was subtracted to reveal the spectrum of  $NH_2Y_{730}\bullet$  (red, 45 % of total spin). *Inset:* Reaction of  $Y_{730}NH_2Y-\alpha 2$  with wt  $\beta 2$  in the absence of CDP/ATP.

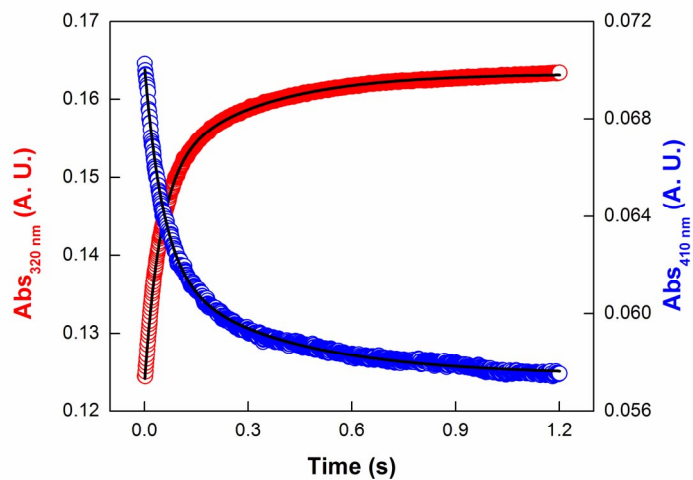

**Figure S4:** Kinetics of  $\text{NH}_2\text{Y}_{731}\bullet$  formation. Pre-reduced  $\text{Y}_{731}\text{NH}_2\text{Y}-\alpha 2$  ( $18\ \mu\text{M}$ ) and CDP ( $2\ \text{mM}$ ) in one syringe were mixed in a 1:1 ratio with  $\beta 2$  ( $18\ \mu\text{M}$ ) and ATP ( $3\ \text{mM}$ ) from another syringe. A total of 6 traces were averaged at 320 nm and 410 nm monitoring  $\text{NH}_2\text{Y}_{731}\bullet$  formation (red) and  $\text{Y}_{122}\bullet$  disappearance (blue), respectively. Black lines indicate bi-exponential fits to the data – see Table 2 for kinetic parameters.

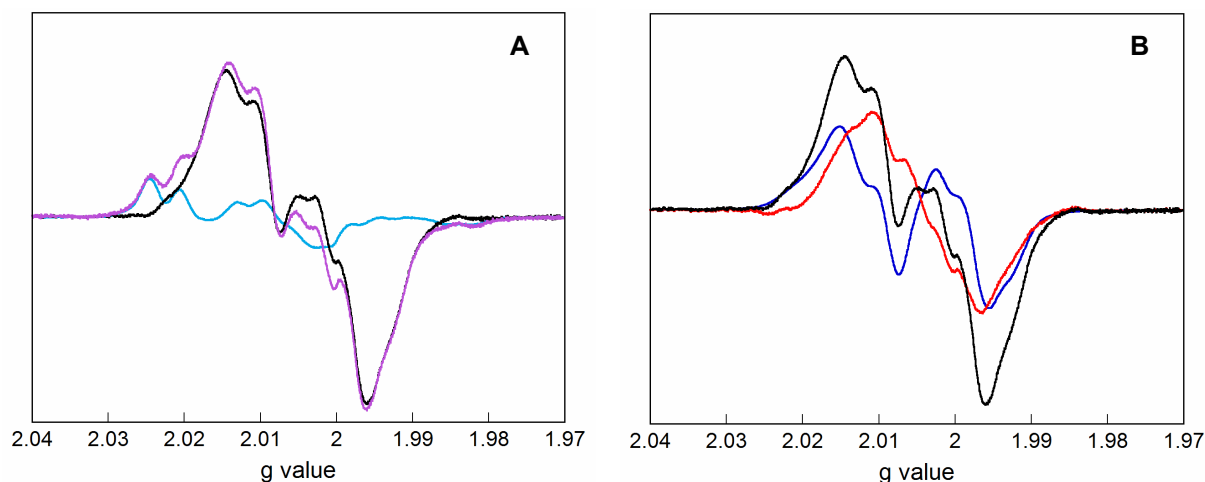

**Figure S5:**  $\text{N}_3\text{ADP}$  Assay for  $\text{Y}_{731}\text{NH}_2\text{Y}-\alpha 2$ . The reaction contained final concentrations of  $20\ \mu\text{M}$   $\text{Y}_{731}\text{NH}_2\text{Y}-\alpha 2\beta 2$  ( $1.2\ \text{Y}_{122}\bullet / \beta 2$ ),  $1\ \text{mM}$   $\text{N}_3\text{ADP}$  and  $250\ \mu\text{M}$   $\text{dGTP}$ . After  $20\ \text{s}$ , it was freeze-quenched by hand in liquid  $\text{N}_2$  and its EPR spectrum recorded. (A) Subtraction of  $\text{N}\bullet$  (aqua,  $20\%$  of total spin) from the observed spectrum (lavender trace) yields the black trace, which contains  $\text{Y}_{122}\bullet$  and  $\text{NH}_2\text{Y}_{731}\bullet$  signals. (B) Subtraction of  $\text{Y}_{122}\bullet$  (blue,  $41\%$  of total) from the resulting spectrum in (A) reveals the spectrum of  $\text{NH}_2\text{Y}_{731}\bullet$  (red,  $39\%$  of total spin). See Table 4 for quantitation of the concentration of each radical species.
